# Supplementary material for: WWOX sensitises ovarian cancer cells to paclitaxel via modulation of the ER stress response
Source: PubMed Central journal article supplement (PMC5550887; doi:10.1038/cddis.2017.346), 2017-07-27

# Supplementary Figure 1

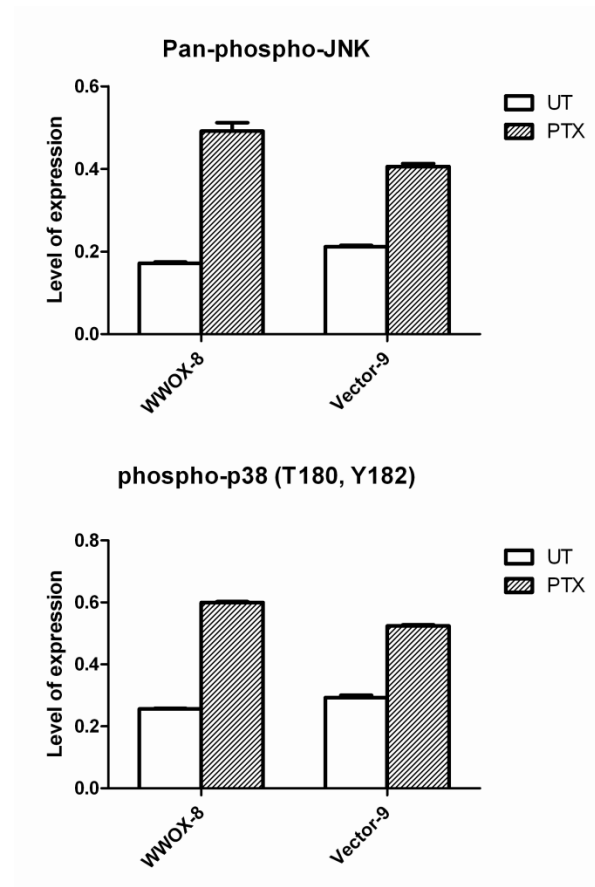

# Supplementary Figure 2

A.

The impact of JNK inhibition on WWOX-8 line growth (72 hrs)

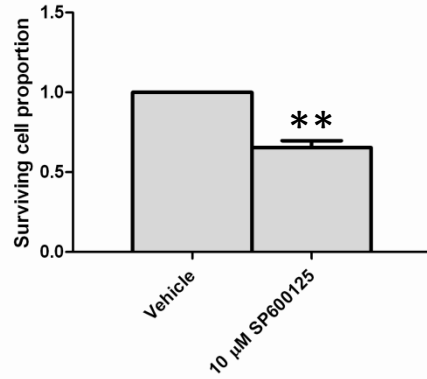

The impact of JNK inhibition on WWOX-8 line paclitaxel sensitivity (72 hrs)

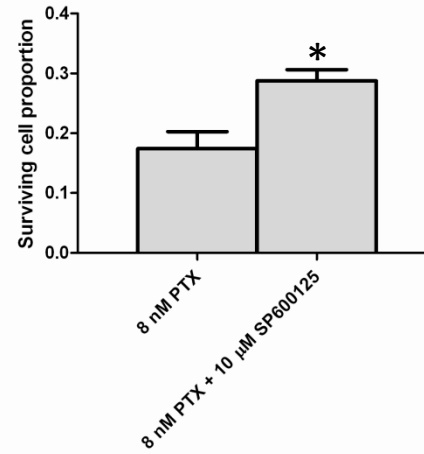

B.

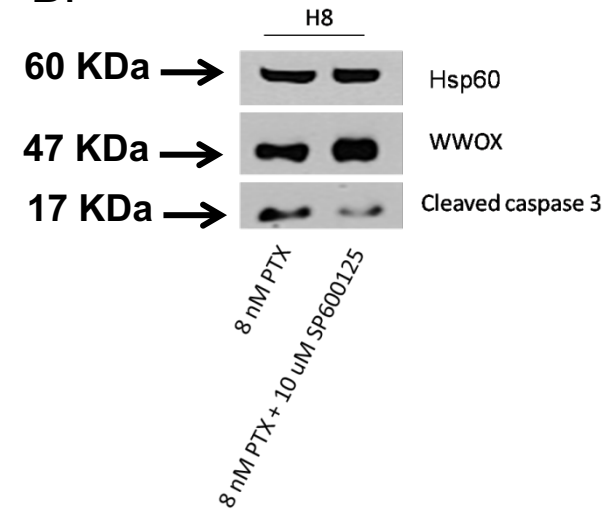

# Supplementary Figure 3

The impact of JNK inhibition on WWOX-8 line growth (48 hrs)

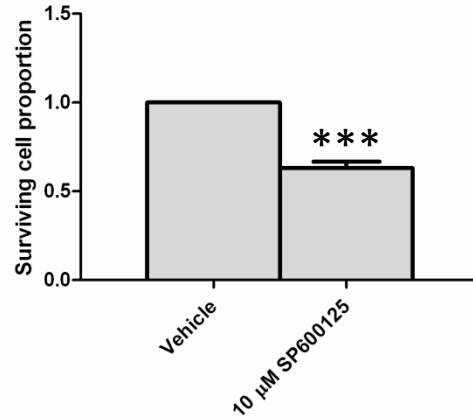

The impact of JNK inhibition on WWOX-8 line tunicamycin sensitivity (48 hrs)

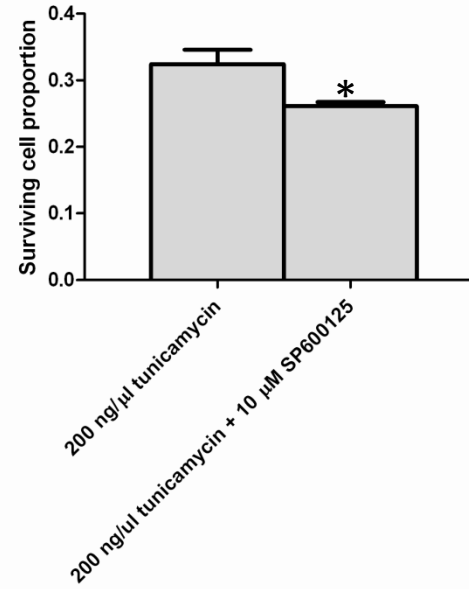

## Supplementary Figure 4

The impact of JNK inhibition on mitotic index in WWOX-8 line (16 hrs)

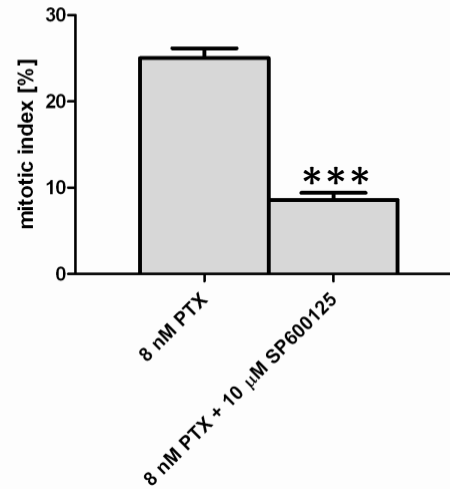

# Supplementary Figure 5

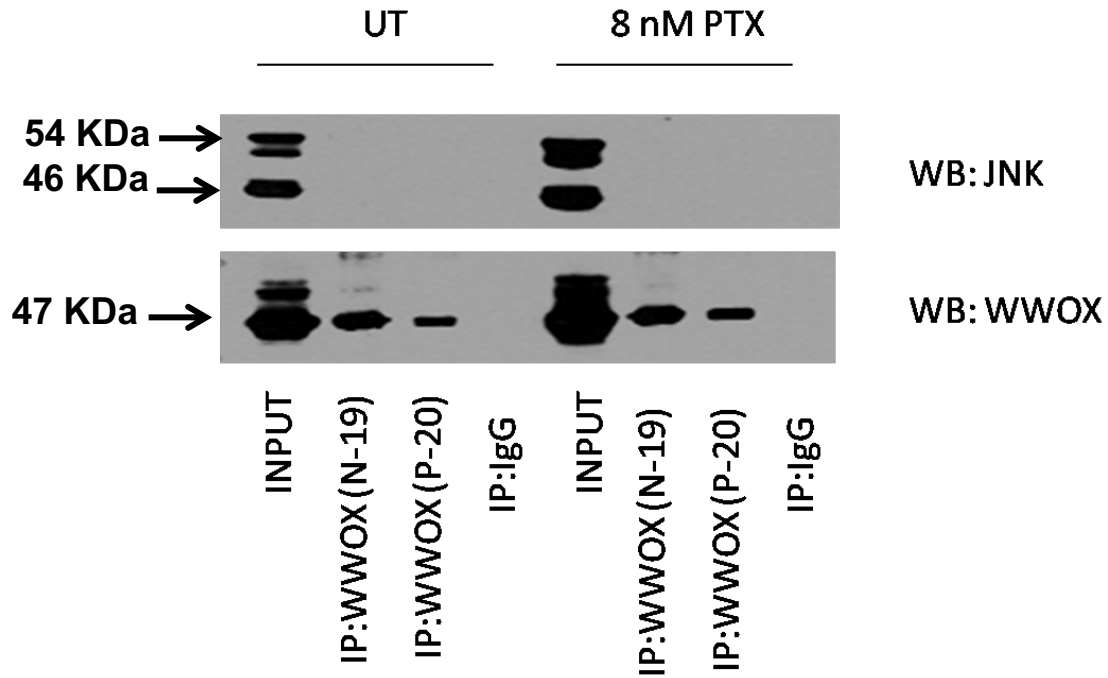

16 hrs 8 nM paclitaxel stimulation



# Supplementary Figure 7

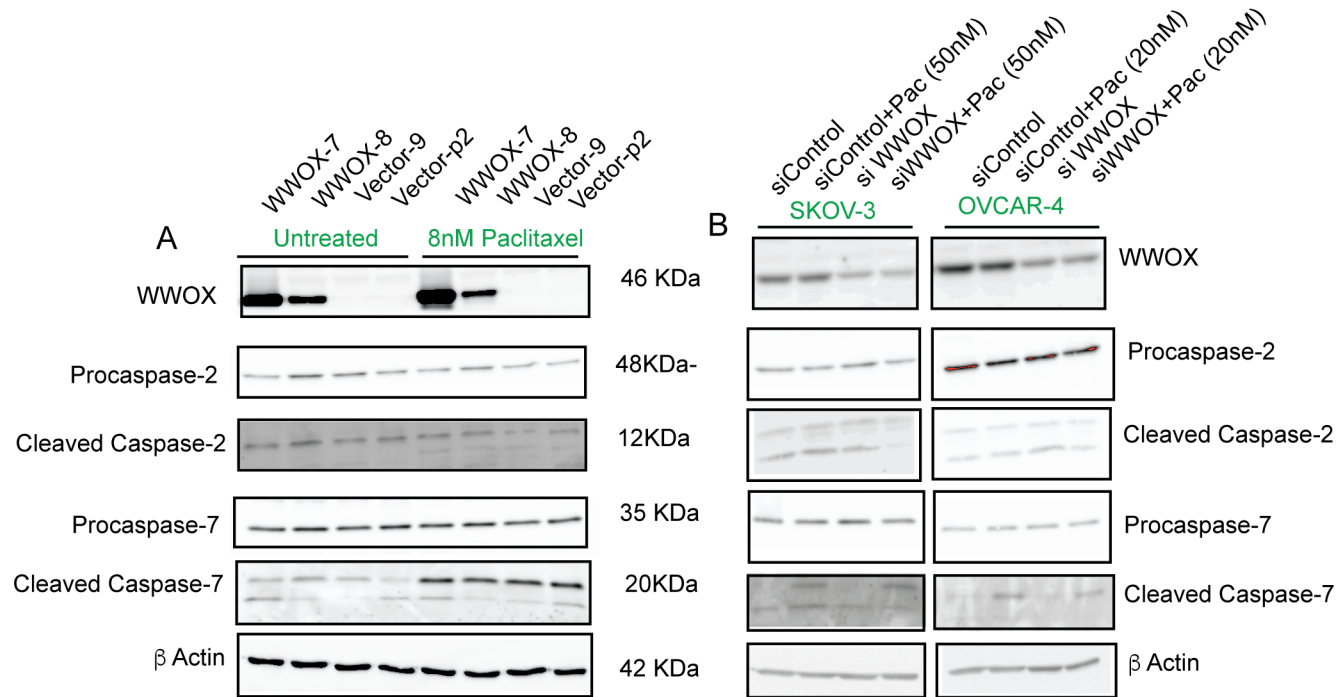

# Supplementary Figure 8

## OVCAR-4

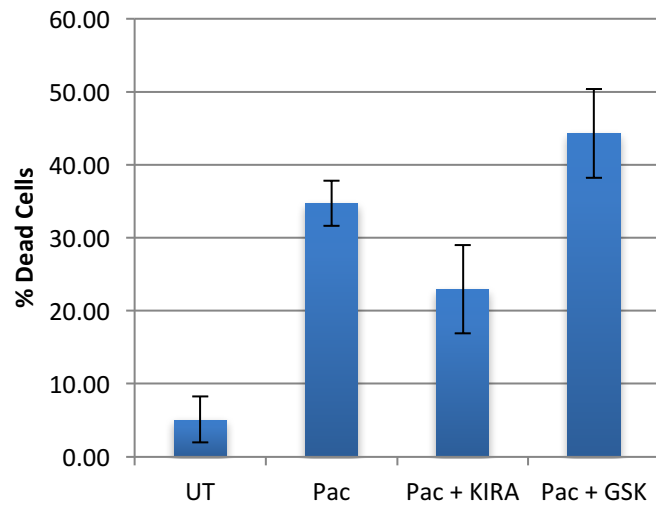

## SKOV-3

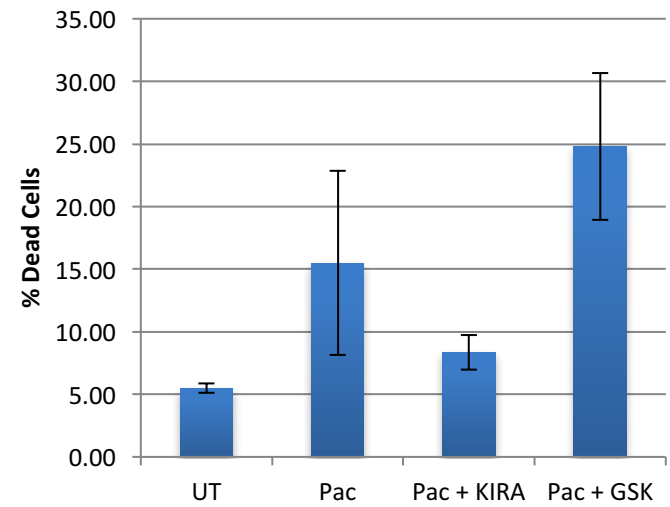



# Supplementary Figure 9

Co-immunoprecipitation to check interaction between GRP78 and WWOX

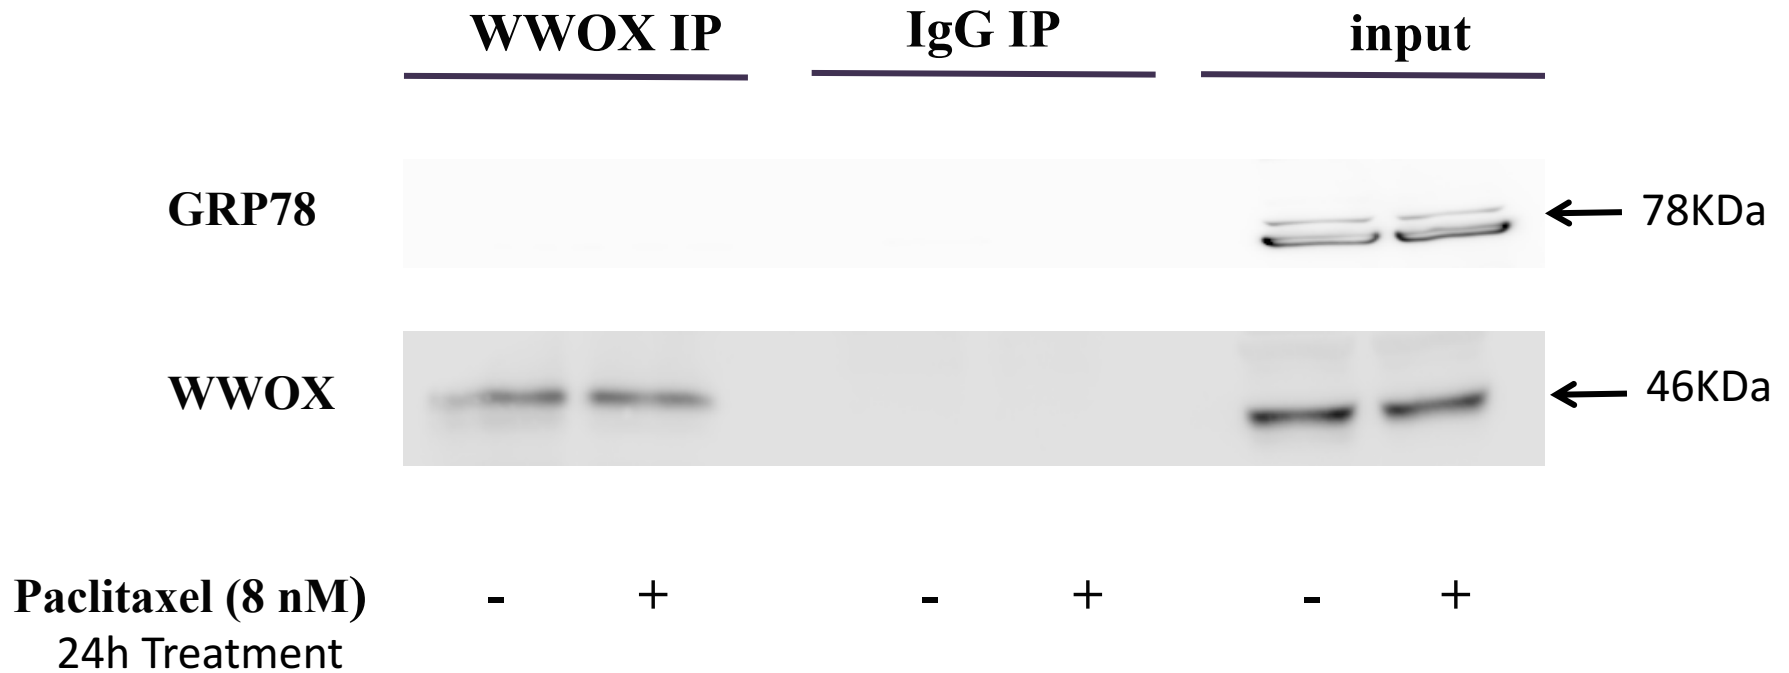

Supplement: cddis2017346x1.pdf [file cddis2017346x1.pdf]
